# Supplementary material for: Cu³⁺/Ni³⁺ Dual Active Sites for High-Voltage Driven Electrocatalytic Production of 2,5-Furanedicarboxylic acid
Source: Royal Society of Chemistry journal article supplement (doi:10.1039/d6qi00021e), 2026-01-01
Supplement: d6qi00021e1.pdf [file d6qi00021e1.pdf]

## **Cu<sup>3+</sup>/Ni<sup>3+</sup> Dual Active Sites for High-Voltage Driven Electrocatalytic**

### **Production of 2,5-Furandicarboxylic acid**

Baoming Yan <sup>a</sup>, Hongliang Dai <sup>a</sup>, Mengyang Yin <sup>a</sup>, Chen Hao <sup>a</sup>, Yutang Shen <sup>a</sup>,  
Hongye Bai <sup>a, \*</sup>, Ying Liu <sup>c, \*</sup>, Guohai Xu <sup>b, \*</sup>, Weiqiang Fan <sup>a, \*</sup>

<sup>a</sup> *School of Chemistry and Chemical Engineering, Jiangsu University, Zhenjiang, 212013, PR China.*

<sup>b</sup> *Key Laboratory of Jiangxi University for Functional Materials Chemistry, School of Chemistry and Chemical Engineering, Gannan Normal University, Ganzhou, 341000, PR China.*

<sup>c</sup> *Multi-scale Porous Materials Center, Institute of Advanced Interdisciplinary Studies & School of Chemistry and Chemical Engineering, Chongqing University, Chongqing 400044, PR China.*

*\* Corresponding author. bhy198412@163.com, liuying11@cqu.edu.cn, xuguohai@gnnu.edu.cn fwq4993329@ujs.edu.cn*

## **1. Experimental section**

### **1.1. Chemicals and Reagents.**

Nickel foam (NF) and  $\text{Cu}(\text{NO}_3)_2 \cdot 3\text{H}_2\text{O}$  (98%) were purchased from Macklin. HMF, FDCA, furan-2,5-dicarbaldehyde (DFF), 5-formyl-2-furancarboxylic acid (FFCA), and 5-hydroxymethyl-2-furancarboxylic acid (HMFCA) were purchased from Macklin.

### **1.2. Synthesis of $\text{Ni}_3\text{S}_2$ .**

NF was sliced into approximately  $2\text{ cm} \times 3\text{ cm}$  pieces and washed sequentially in  $1\text{ mol L}^{-1}$  HCl solution, anhydrous ethanol, and deionized water for 30 min. NF was then vacuum dried at  $60\text{ }^\circ\text{C}$  overnight. Afterward, a piece of cleaned NF was immersed in 30 mL thiourea aqueous solution (1.5 mM). Then, it was transferred to an autoclave and maintained at  $140\text{ }^\circ\text{C}$  for 12 h. The prepared  $\text{Ni}_3\text{S}_2$  were rinsed repeatedly with deionized water and dried at  $60\text{ }^\circ\text{C}$  overnight.

### **1.3. Synthesis of Cu-NF.**

NF was sliced into approximately  $1\text{ cm} \times 2\text{ cm}$  pieces, Cu-NF was prepared by electrodeposition via a three-electrode system at  $-1.2\text{ V}$  vs Ag/AgCl ( $25\text{ }^\circ\text{C}$ ). The electrolyte solution was obtained by dissolving  $\text{Cu}(\text{NO}_3)_2 \cdot 3\text{H}_2\text{O}$  (1.2 g) in deionized water (50 mL). The prepared Cu-NF samples were rinsed repeatedly with deionized water and dried at  $60\text{ }^\circ\text{C}$  overnight.

### **1.4. Synthesis of Cu- $\text{Ni}_3\text{S}_2$ .**

$\text{Ni}_3\text{S}_2$  sample was cut into  $1\text{ cm} \times 2\text{ cm}$  pieces. Cu- $\text{Ni}_3\text{S}_2$  was prepared by electrodeposition in a three-electrode system at  $-1.2\text{ V}$  vs Ag/AgCl ( $25\text{ }^\circ\text{C}$ ) with  $\text{Cu}(\text{NO}_3)_2$  electrolyte. The prepared samples were repeatedly rinsed with deionized water to remove residual electrolyte from the surface and dried overnight at  $60\text{ }^\circ\text{C}$ .

### **1.5. Characterization.**

Morphological characterization of the samples was studied using scanning

electron microscopy (SEM, Apreo S HiVac) and high-resolution transmission electron microscopy (HR-TEM, JEM-2100). Crystallographic phase analysis was performed by X-ray diffraction (XRD, SmartLab). Chemical composition and valence states were evaluated by X-ray photoelectron spectroscopy (XPS, ESCALAB QXi). Raman spectroscopy (Raman, DXR) was utilized to obtain information on the molecular structure and determine the chemical bonds.

### 1.6. Electrochemical Measurements.

The electrochemical measurements were performed on a CHI 660 E. The system consists of the sample (1 cm × 2 cm) as the working electrode, a Hg/HgO (reference electrode) and a platinum wire (counter electrode). All experiments were carried out in 1 M KOH.

### 1.7. Sample Activation Methods.

The 100 cyclic voltammetry (CV) scans (0.8–1.8V<sub>RHE</sub>, 50mV s<sup>-1</sup>) were carried out in 1 M KOH to ensure the complete activation of the sample (Fig. S1).

### 1.8. Quantitative Analysis of Products.

The reaction products were analyzed by high performance liquid chromatography (HPLC, Shimadzu) equipped with a Shim-pack GWS C-18 reversed-phase column (4.6 × 150 mm, 5 μm particle size). The chromatographic separation temperature was 35 °C, and UV detection wavelength was 265 nm. For analysis, 20 μL of mixed samples were collected from the reaction cell and diluted to 2 mL with deionized water. HMF conversion, FDCA yield, and FE were calculated using the following equations, where F stands for Faraday's constant.

$$\text{HMF conversion (\%)} = \frac{\text{mole of consumed HMF}}{\text{mole of initial HMF}} \times 100\%$$

$$\text{FDCA yield (\%)} = \frac{\text{mole of FDCA formed}}{\text{mole of initial HMF}} \times 100\%$$

$$\text{FE of FDCA (\%)} = \frac{\text{mole of FDCA formed}}{\text{total charge pass}/(6 \times F)} \times 100\%$$

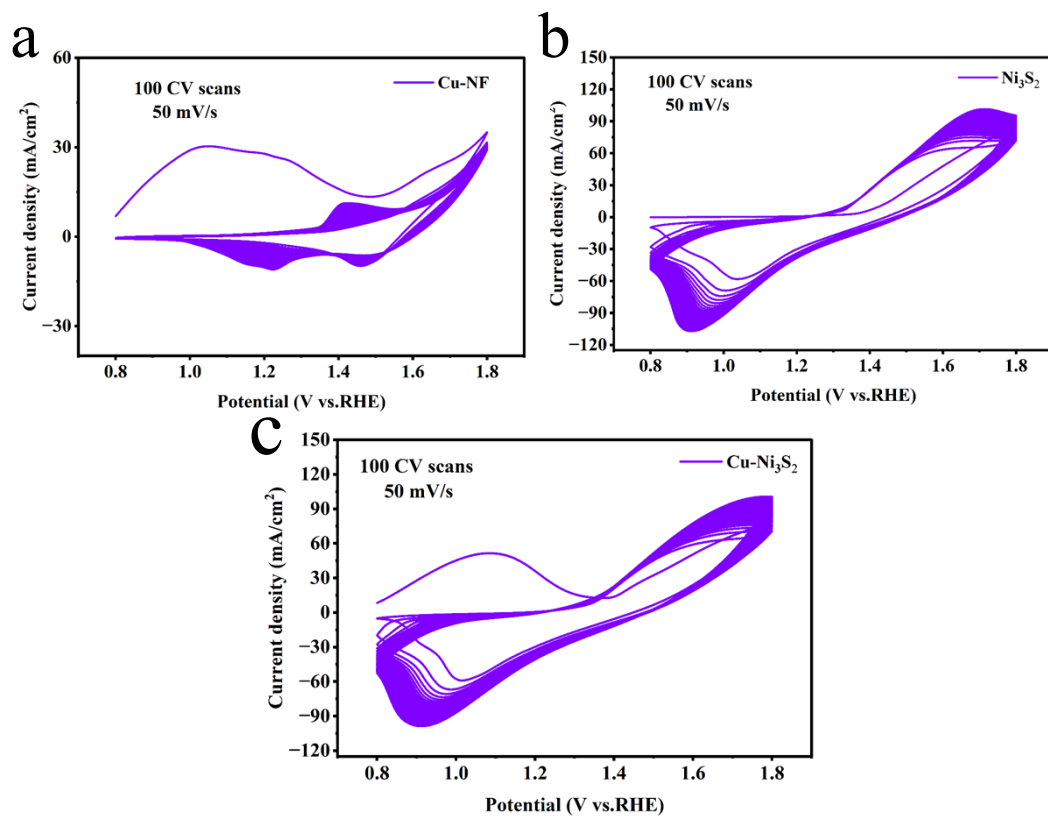

**Fig. S1.** CV curves of (a) Cu-NF, (b) Ni<sub>3</sub>S<sub>2</sub>, and (c) Cu-Ni<sub>3</sub>S<sub>2</sub> at 50 mV/s in 1 M KOH.

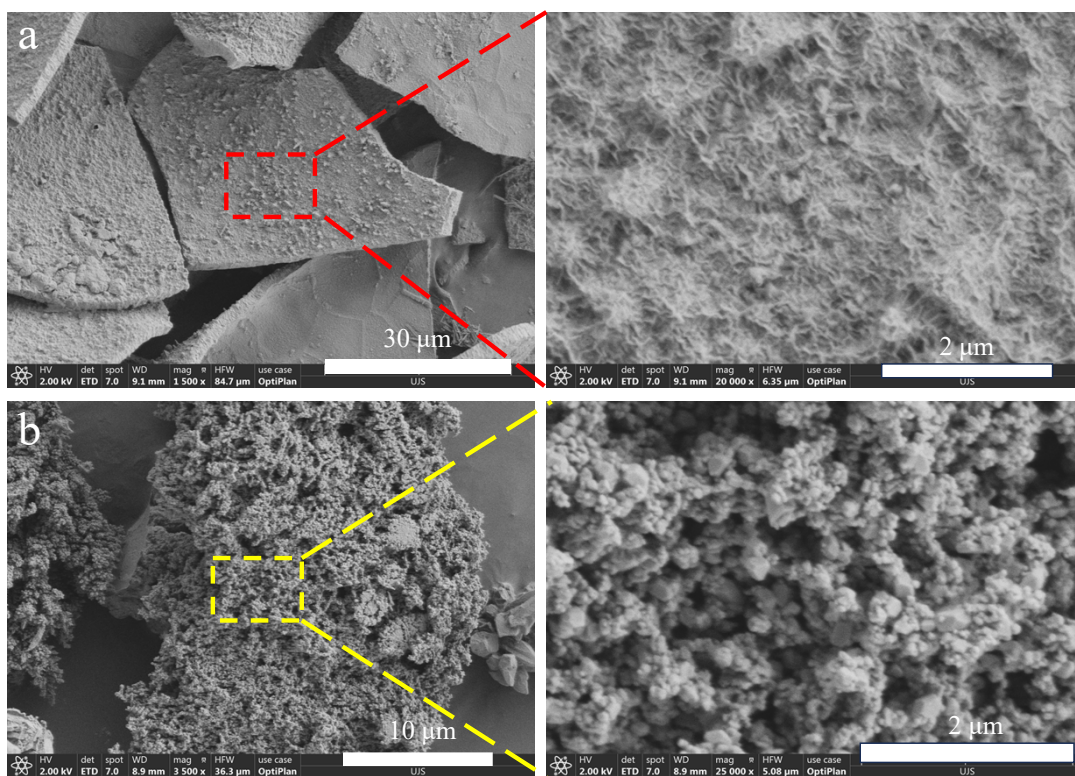

**Fig. S2.** SEM images of (a) Cu-NF, (b) Ni<sub>3</sub>S<sub>2</sub>.

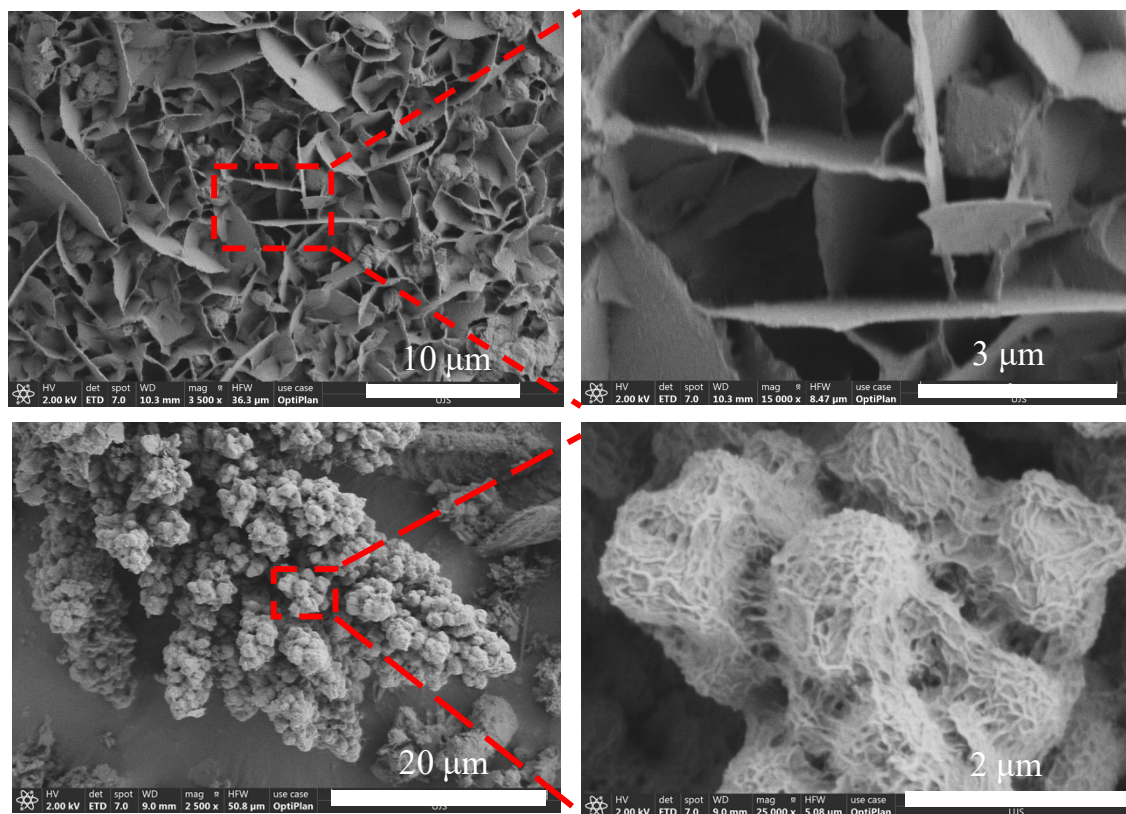

**Fig. S3.** SEM images of (a) Cu-Ni<sub>3</sub>S<sub>2</sub>, (b) activated Cu-Ni<sub>3</sub>S<sub>2</sub>.

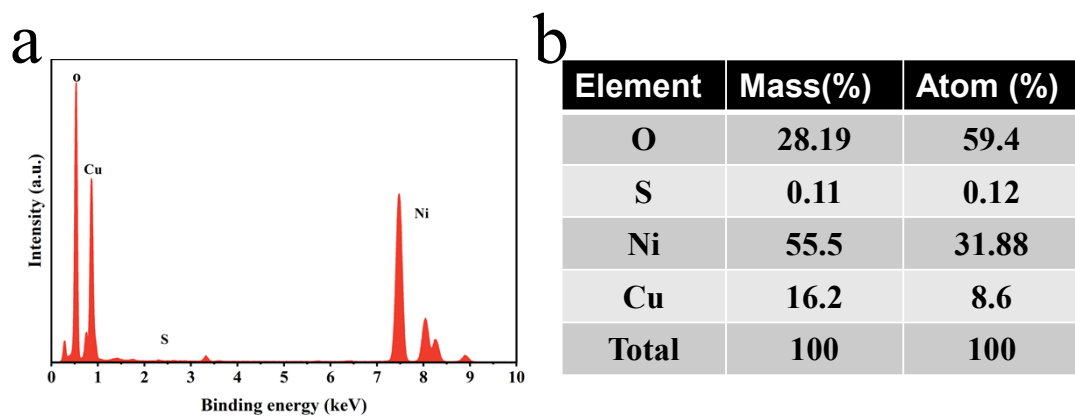

**Fig. S4.** Energy dispersive spectroscopy (EDS) of Cu-Ni<sub>3</sub>S<sub>2</sub>.



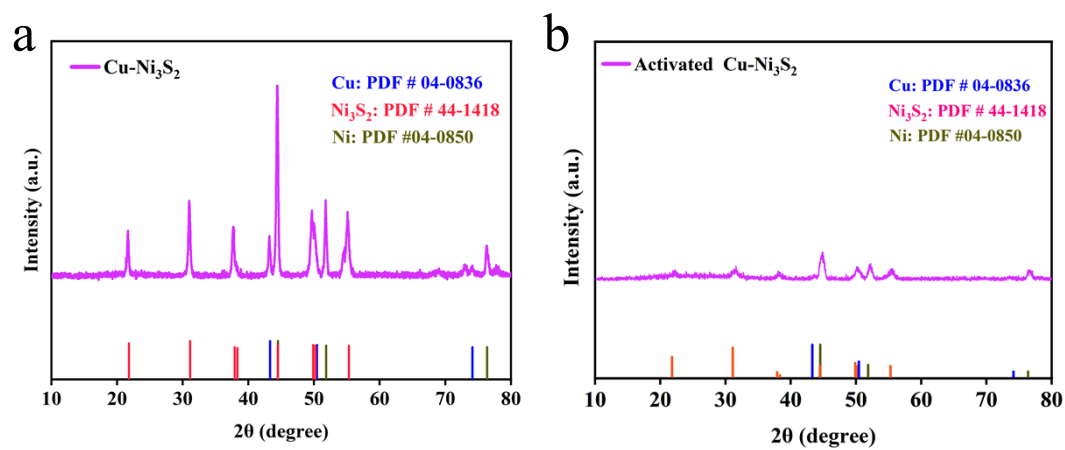

**Fig. S5.** XRD images of (a)  $\text{Cu-Ni}_3\text{S}_2$ , and (b) activated  $\text{Cu-Ni}_3\text{S}_2$ .

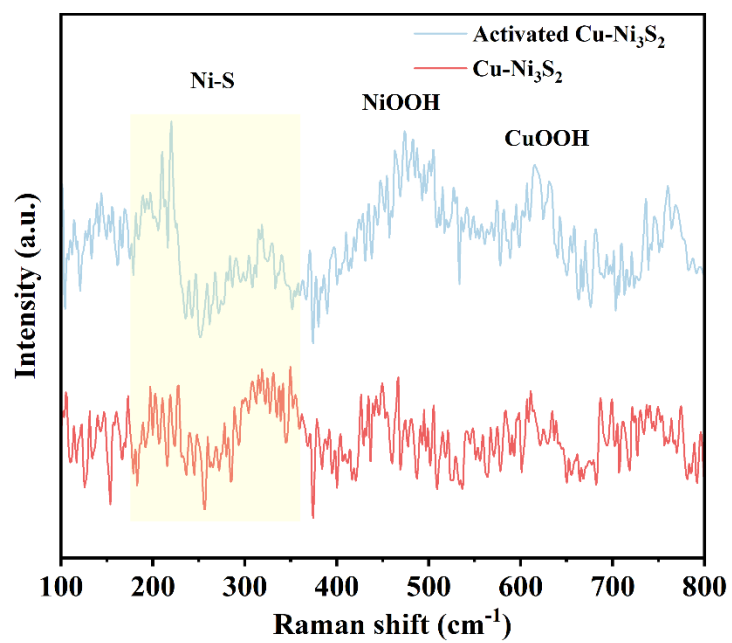

**Fig. S6.** Raman shift of Cu-Ni<sub>3</sub>S<sub>2</sub> and activated Cu-Ni<sub>3</sub>S<sub>2</sub>.

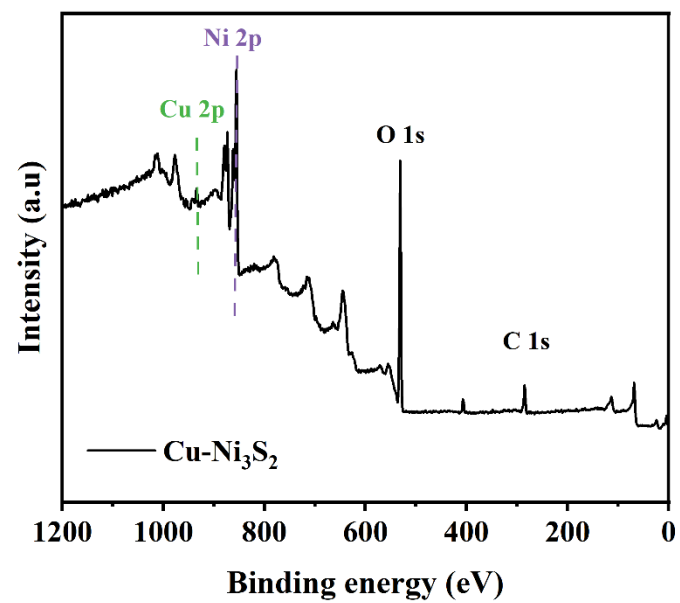

**Fig. S7.** Full-scan XPS spectra of Cu-Ni<sub>3</sub>S<sub>2</sub>.

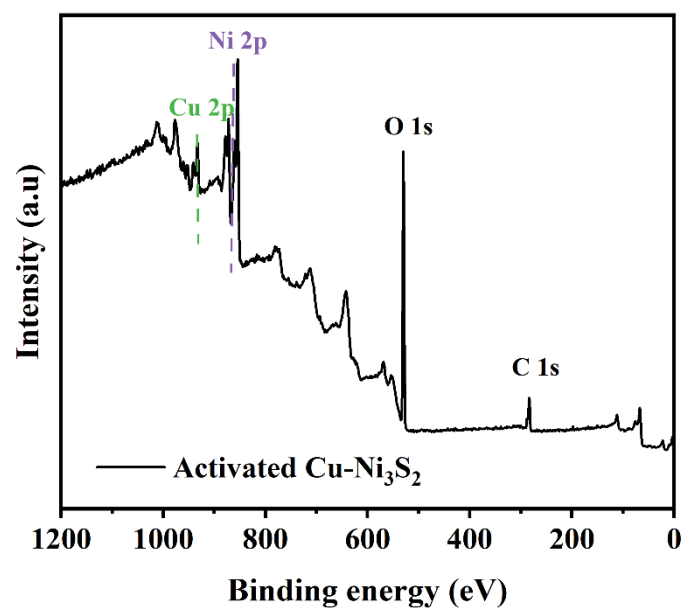

**Fig. S8.** Full-scan XPS spectra of activated  $\text{Cu-Ni}_3\text{S}_2$ .

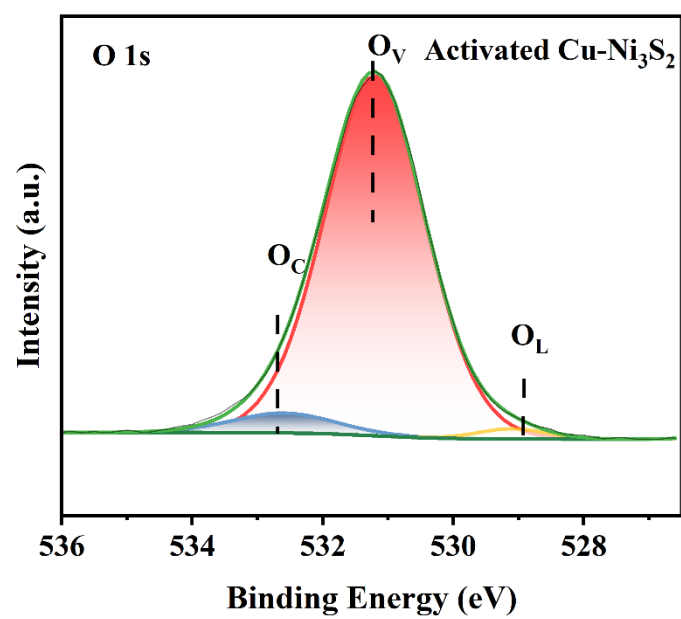

**Fig. S9.** XPS spectra of O 1s for activated Cu-Ni<sub>3</sub>S<sub>2</sub>.

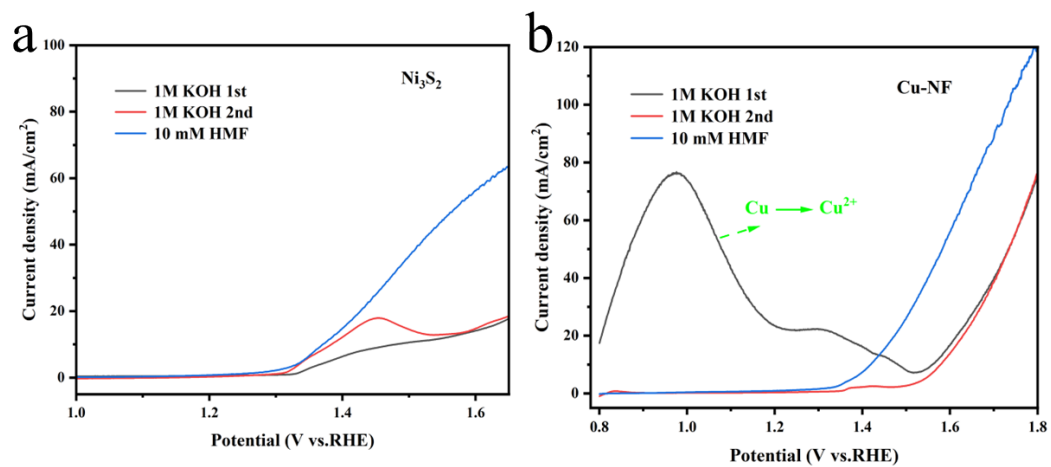

**Fig. S10.** LSV curves of (a) Ni<sub>3</sub>S<sub>2</sub>, and (b) Cu-NF with and without 10 mM HMF.

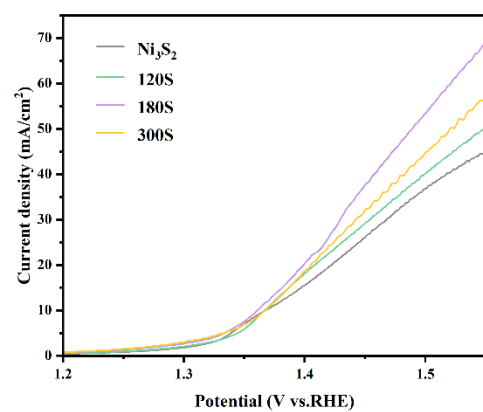

**Fig. S11.** LSV curves of Cu-Ni<sub>3</sub>S<sub>2</sub> at different electrodeposition times for Cu.

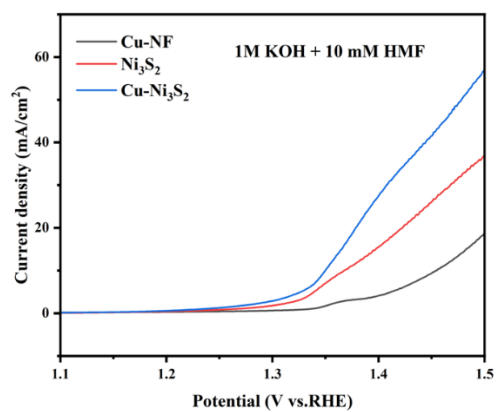

**Fig. S12.** LSV curves of Cu-NF, Ni<sub>3</sub>S<sub>2</sub> and Cu-Ni<sub>3</sub>S<sub>2</sub> in 1 M KOH and 10 mM HMF.



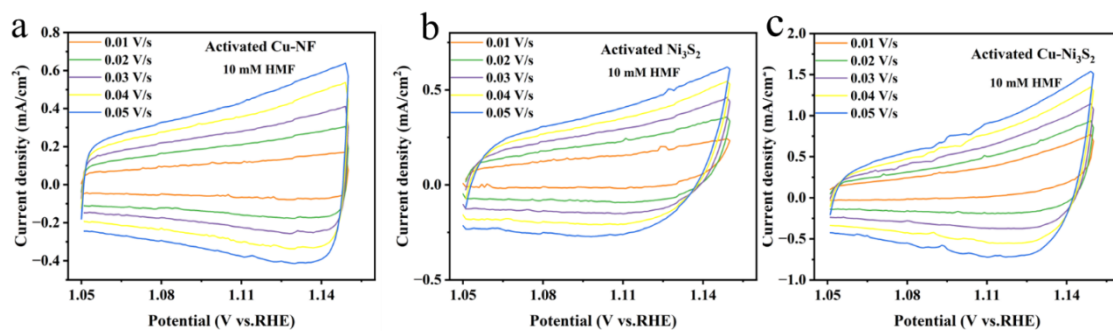

**Fig. S13.** CV curves of (a) activated Cu-NF (b) activated Ni<sub>3</sub>S<sub>2</sub>, and (c) activated Cu-Ni<sub>3</sub>S<sub>2</sub> at different scan rates.

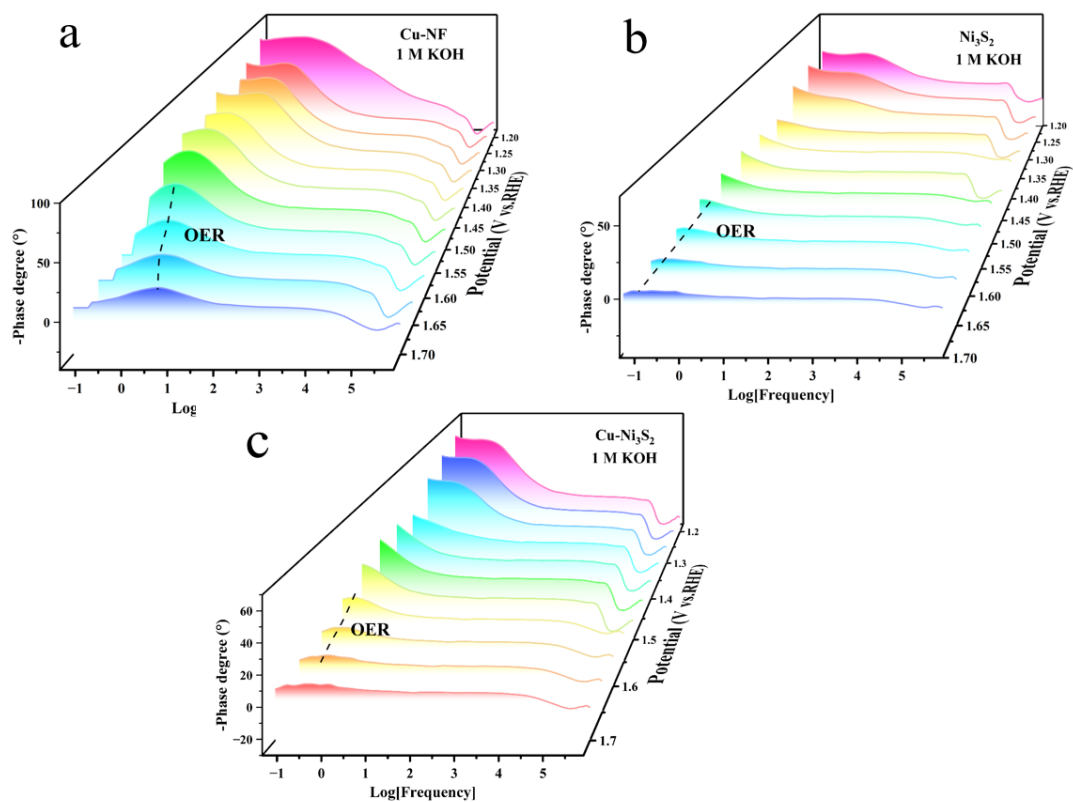

**Fig. S14.** Operando EIS spectra of (a) Cu-NF, (b) Ni<sub>3</sub>S<sub>2</sub>, and (c) Cu-Ni<sub>3</sub>S<sub>2</sub> under different potentials in 1 M KOH.

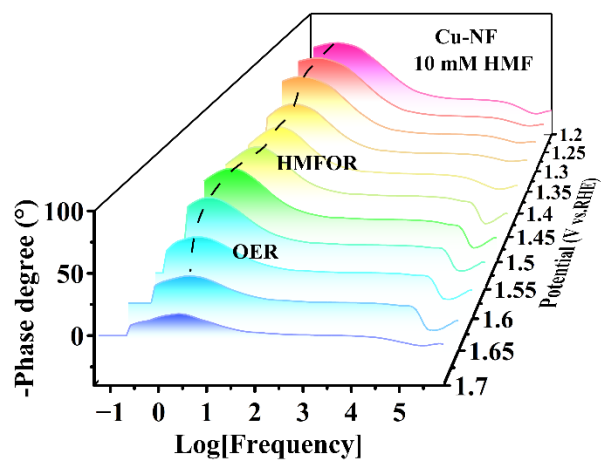

**Fig. S15.** Operando EIS spectra of Cu-NF under different potentials in 10 mM HMF.

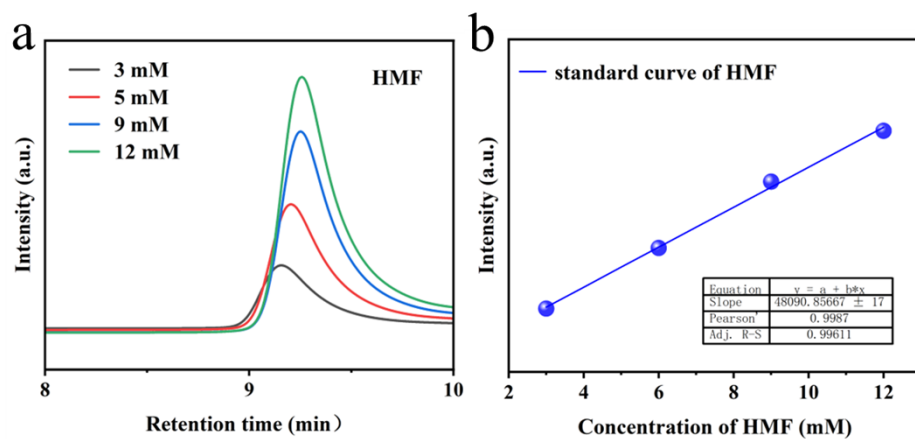

**Fig. S16.** (a) HPLC measurement, and (b) calibration curve of HMF.

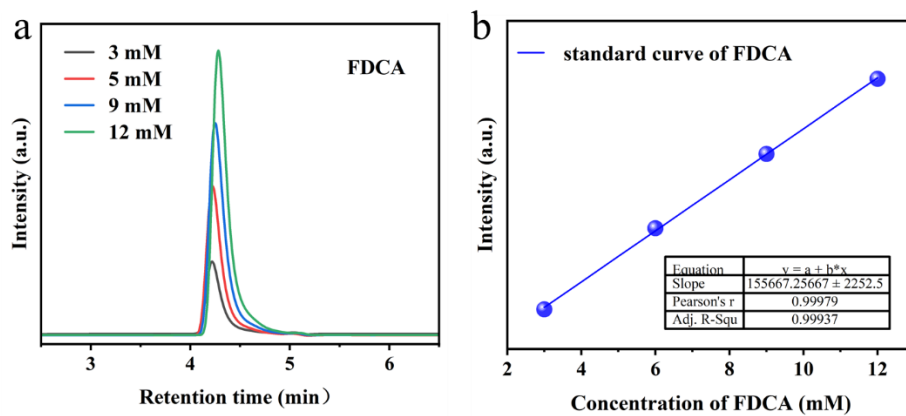

**Fig. S17.** (a) HPLC measurement, and (b) calibration curve of FDCA.

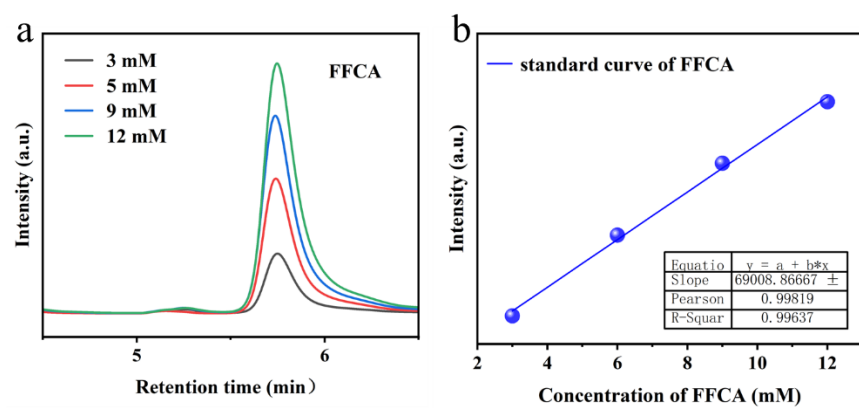

**Fig. S18.** (a) HPLC measurement, and (b) calibration curve of FFCA.

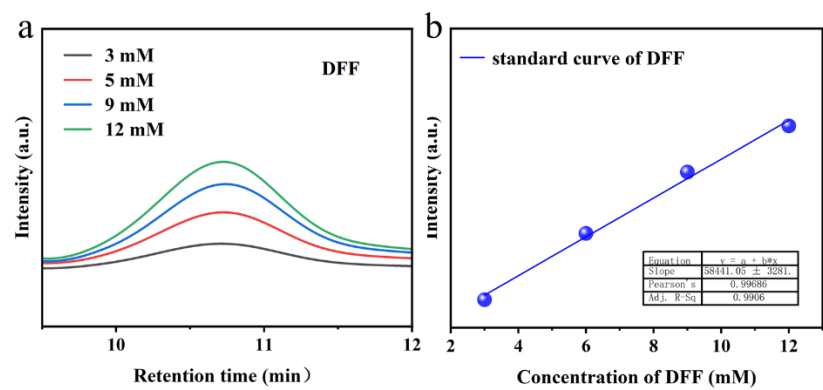

**Fig. S19.** (a) HPLC measurement, and (b) calibration curve of DFF.

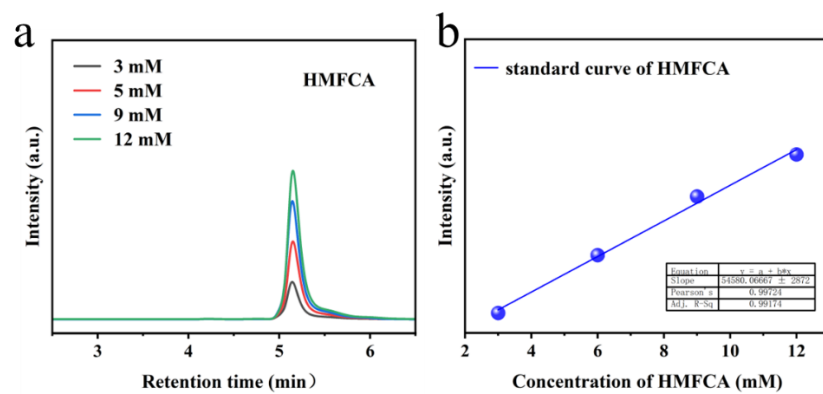

**Fig. S20** (a) HPLC measurement, and (b) calibration curve of HMFCA.



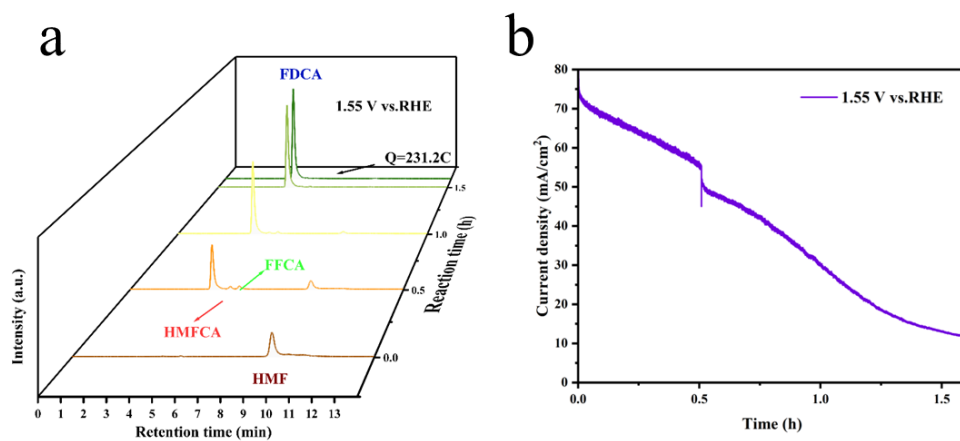

**Fig. S21.** (a) HPLC chromatograms (1.55  $V_{\text{RHE}}$ , 10 mM HMF, 1 M KOH) of the activated  $\text{Cu-Ni}_3\text{S}_2$ . (b) The curve of current density vs time over the activated  $\text{Cu-Ni}_3\text{S}_2$

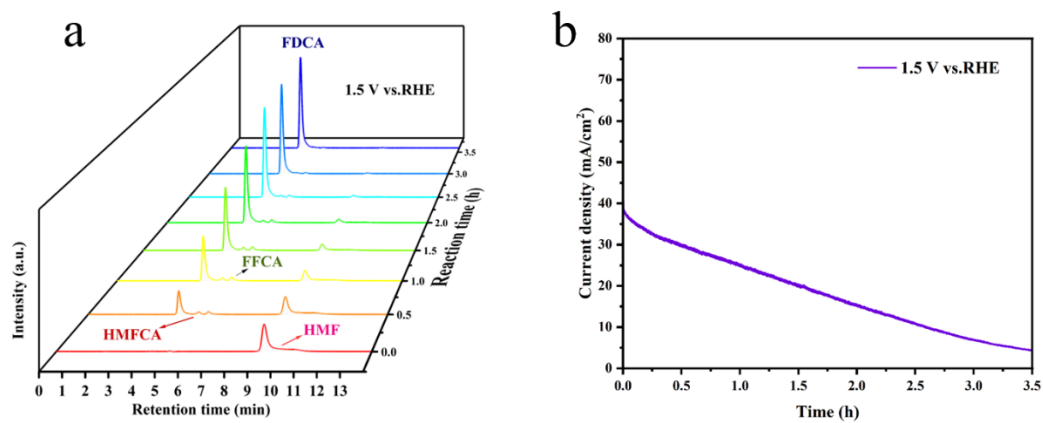

**Fig. S22.** (a) HPLC chromatograms (1.50 V<sub>RHE</sub>, 10 mM HMF, 1 M KOH) of the activated Cu-Ni<sub>3</sub>S<sub>2</sub>. (b) The curve of current density vs time over the activated Cu-Ni<sub>3</sub>S<sub>2</sub>

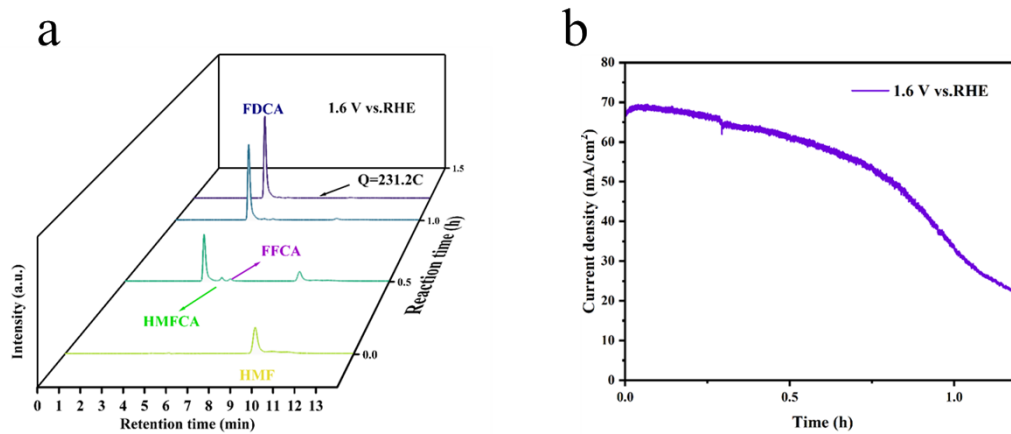

**Fig. S23.** (a) HPLC chromatograms (1.6 V<sub>RHE</sub>, 10 mM HMF, 1 M KOH) of the activated Cu-Ni<sub>3</sub>S<sub>2</sub>. (b) The curve of current density vs time over the activated Cu-Ni<sub>3</sub>S<sub>2</sub>

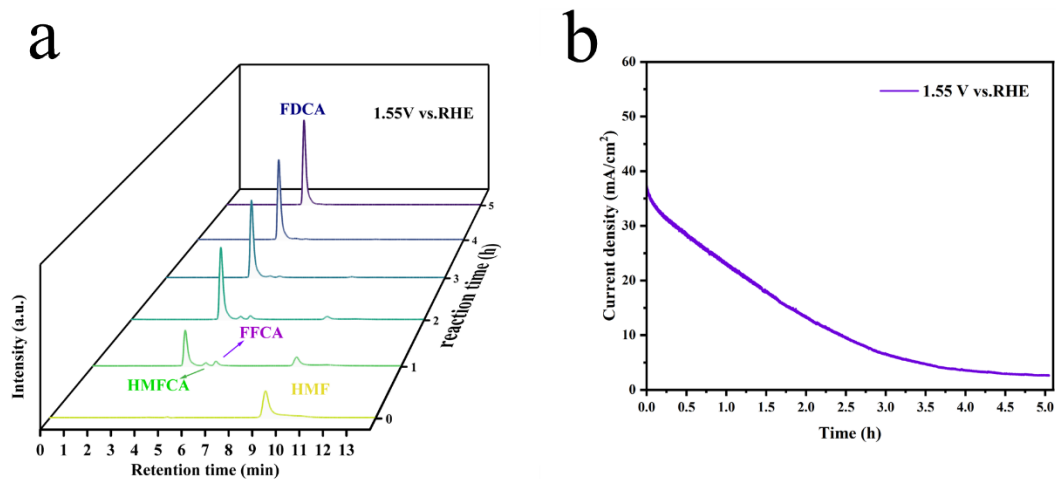

**Fig. S24.** (a) HPLC chromatograms (1.55  $V_{\text{RHE}}$ , 10 mM HMF, 1 M KOH) of the activated Cu-NF. (b) The curve of current density vs time over the activated Cu-NF.

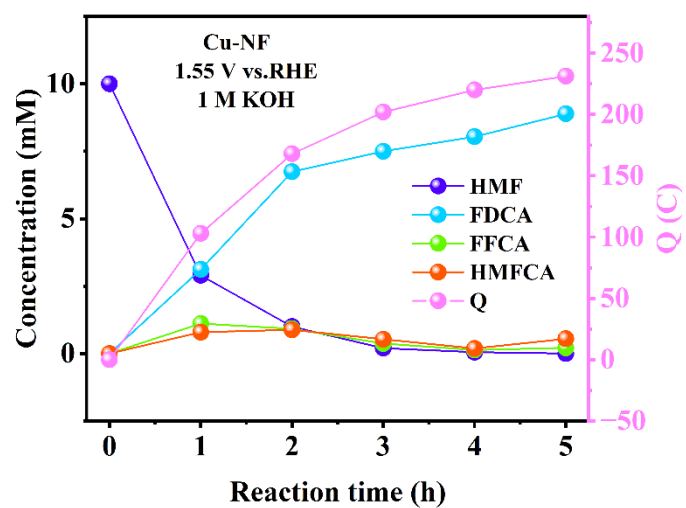

**Fig. S25.** Concentration of HMF, FDCA, HMFCFA, FFCA, and total charge vs time over the activated Cu-NF at 1.55  $V_{\text{RHE}}$  (1 M KOH, 10 mM HMF).

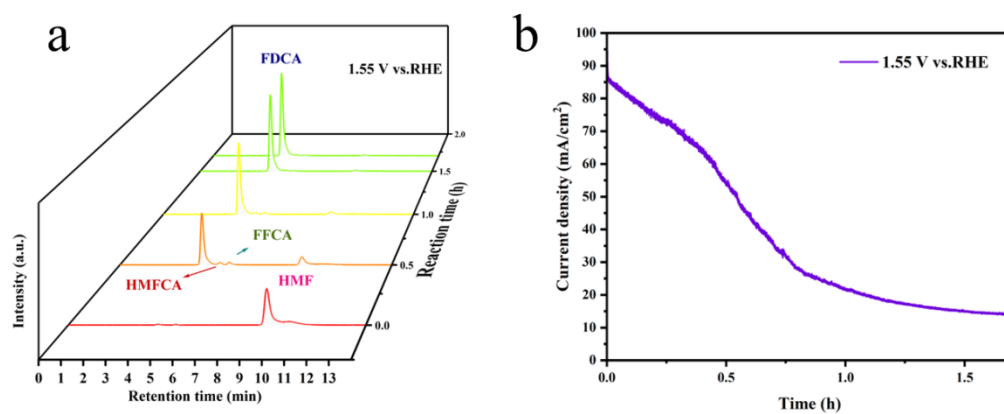

**Fig. S26.** (a) HPLC chromatograms (1.55 V<sub>RHE</sub>, 10 mM HMF, 1 M KOH) of the activated Ni<sub>3</sub>S<sub>2</sub>. (b) The curve of current density vs time over the activated Ni<sub>3</sub>S<sub>2</sub>.

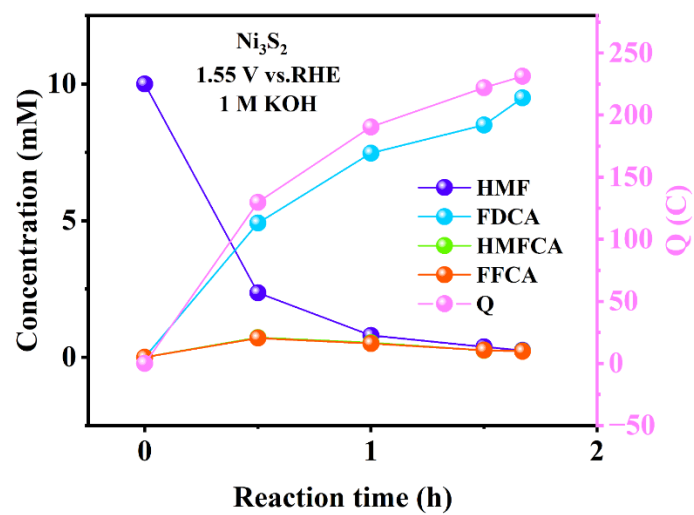

**Fig. S27.** Concentration of HMF, FDCA, HMFCa, FFCA, and total charge vs time over the activated  $\text{Ni}_3\text{S}_2$  at 1.55  $V_{\text{RHE}}$  (1 M KOH, 10 mM HMF).

**Table S1.** Results of Inductively Coupled Plasma (ICP) after Electrolysis

| Total electrolyte volume (mL) | Electrolyte<br>volume for<br>ICP-MS (mL) | Test element | Sample<br>Element<br>Content C<br>(mg/L) |
|-------------------------------|------------------------------------------|--------------|------------------------------------------|
| 40                            | 2                                        | Ni           | 0.089                                    |
| 40                            | 2                                        | Cu           | 3.07                                     |



**Table S2.** Reported electrochemical Oxidation of HMF to FDCA systems.

| HMF    | FDCA<br>yield<br>(%) | FE<br>(%) | Potential<br>(vs.<br>RHE) | KOH | Catalysts                                                                | Ref.                 |
|--------|----------------------|-----------|---------------------------|-----|--------------------------------------------------------------------------|----------------------|
| 10 mM  | 99.2                 | 97.3      | 1.34 V                    | 1 M | W <sub>20</sub> -Ni <sub>3</sub> S <sub>2</sub> @NF                      | [1]                  |
| 10 mM  | 97.6                 | 97.6      | 1.38 V                    | 1 M | H-0.3Co-Ni <sub>3</sub> S <sub>2</sub>                                   | [2]                  |
| 20 mM  | 100                  | 100       | 1.4 V                     | 1 M | Cu/Ni <sub>3</sub> S <sub>2</sub> -R                                     | [3]                  |
| 50 mM  | 98.8                 | 97.6      | 1.45 V                    | 1 M | Ni <sub>3</sub> S <sub>2</sub> /NF                                       | [4]                  |
| 10mM/L | 98.1                 | 98.8      | 1.42 V                    | 1 M | P-Ni <sub>3</sub> S <sub>2</sub> /Ni/NF                                  | [5]                  |
| 100 mM | 97.6                 | 94.2      | 1.40 V                    | 1 M | Mn0.2NiS/GF                                                              | [6]                  |
| 20 mM  | 84                   | 84        | 1.40 V                    | 1 M | Ni <sub>3</sub> S <sub>2</sub> -Co <sub>9</sub> S <sub>8</sub> /CoLDH/NF | [7]                  |
| 10 mM  | 98                   | 100       | 1.45 V                    | 1 M | NiS <sub>x</sub> /CB-2                                                   | [8]                  |
| 20 mM  | 98                   | 98        | 1.5 V                     | 1 M | Ni <sub>3</sub> S <sub>2</sub> /NiO <sub>x</sub>                         | [9]                  |
| 10 mM  | 99                   | 99        | 1.45 V                    | 1 M | Co <sub>0.4</sub> NiS@NF                                                 | [10]                 |
| 10 mM  | 100                  | 100       | 1.45V                     | 1 M | Co <sub>9</sub> S <sub>8</sub> -Ni <sub>3</sub> S <sub>2</sub> /Cu       | [11]                 |
| 10 mM  | 100                  | 100       | 1.55 V                    | 1 M | Cu-Ni <sub>3</sub> S <sub>2</sub>                                        | <b>This<br/>work</b> |

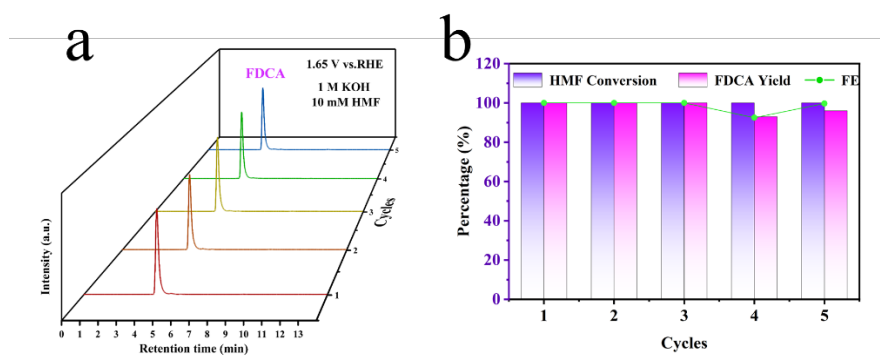

**Fig. S28.** (a) HPLC chromatograms of 5 cycles. (b) HMF conversion, FDCA yield and FE over activated Cu-Ni<sub>3</sub>S<sub>2</sub> during 5 successive of HMF oxidation (1.55 V<sub>RHE</sub>, 10 mM HMF, 1.0 M KOH).

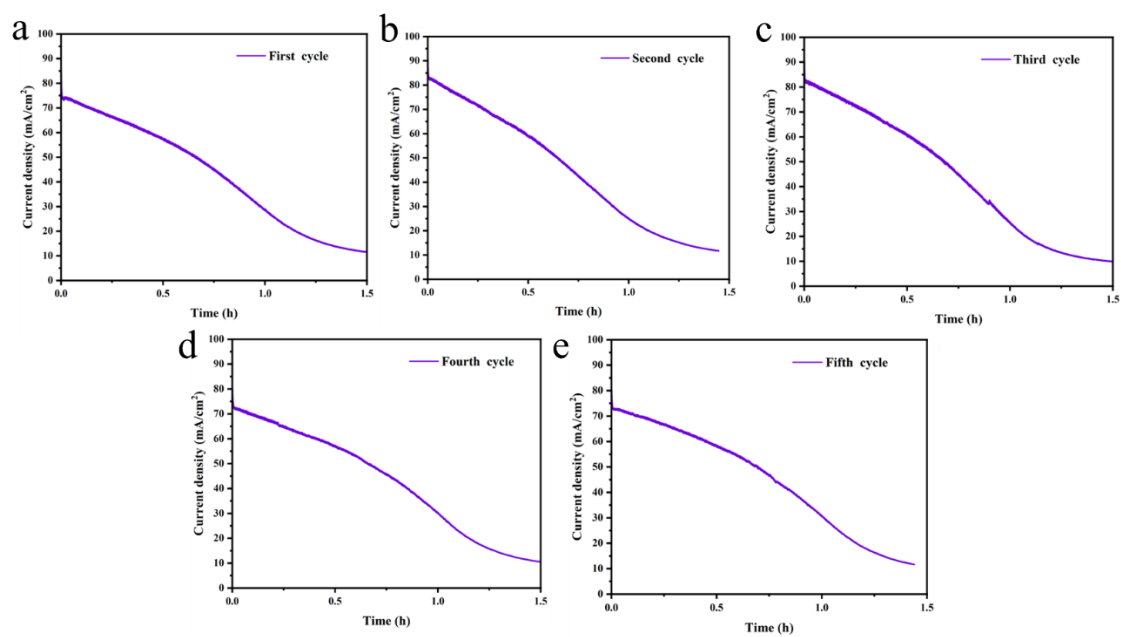

**Fig. S29.** The curve of current density vs time for 5 cycles.

## References

1. S. Wang, G. Yang, Y. Jiao, Y. Liu, C. Tian, A. Wu, H. Yan, Tuning electronic structure of Ni<sub>3</sub>S<sub>2</sub> with tungsten doping for high-performance electrooxidation of 5-hydroxymethylfurfural, *Sci. China Chem.*, 2023, **66**, 3636-3644.
2. X. Zhang, Y. Li, J. Wang, G. Zeng, Q. Zhong, H<sub>2</sub>O<sub>2</sub>-assisted fabricate nickel cobalt sulfide as the efficient catalyst for the novel strategy of 5-hydroxymethylfurfural stepwise electrolysis, *Appl. Surf. Sci.*, 2023, **639**, 158198.
3. P. Xu, Z. Bao, Y. Zhao, L. Zheng, Z. Lv, X. Shi, H. Wang, X. Fang, H. Zheng, Anionic Regulation and Heteroatom Doping of Ni-Based Electrocatalysts to Boost Biomass Valorization Coupled with Hydrogen Production, *Adv. Energy Mater.*, 2024, **14**, 2303557.
4. L. Chen, Z. Yang, C. Yan, Y. Yin, Z. Xue, Y. Yao, S. Wang, F. Sun, T. Mu, Modulating Ni–S coordination in Ni<sub>3</sub>S<sub>2</sub> to promote electrocatalytic oxidation of 5-hydroxymethylfurfural at ampere-level current density, *Chem. Sci.*, 2024, **30**, 12047-57.
5. M. Liu, J. Yin, C. Wang, W. Wang, Y. Gao, M. Yan, P. Geng, P doped Ni<sub>3</sub>S<sub>2</sub> and Ni heterojunction bifunctional catalysts for electrocatalytic 5-hydroxymethylfurfural oxidation coupled hydrogen evolution reaction, *Chin. Chem. Lett.*, 2025, **36**, 111271.
6. S. Li, S. Wang, Y. Wang, J. He, K. Li, Y. Xu, M. Wang, S. Zhao, X. Li, X. Zhong, J. Wang, Doped Mn Enhanced NiS Electrooxidation Performance of HMF into FDCA at Industrial-Level Current Density, *Adv. Funct. Mater.*, 2023, **24**, 2214488
7. T. Zhang, M. Xiang, X. Yang, C. Fu, Z. Yan, Z. Xu, Ni<sub>3</sub>S<sub>2</sub>–Co<sub>9</sub>S<sub>8</sub> Heterojunction Integrated within Cobalt Layered Double Hydroxide Nanosheets for 5-Hydroxymethylfurfural Oxidation and Oxygen Evolution Reaction, *ACS Appl. Nano Mater.*, **2025**, **8**, 7278-89.
8. C. Yi, J. Li, Z. Liu, Ni<sub>3</sub>S<sub>2</sub>/carbon black hybrids for efficient electrochemical oxidation of 5-hydroxymethylfurfural to 2,5-furandicarboxylic acid, *Catal. Today*, 2025, **443**, 114967.
9. Y. Zhang, J. Kuang, J. Yu, Y. Dong, J. Li, T. Xue, J. Wu, J.C Ma, J. Wan, S. Zeng, Y. Sun. Y. Zhang, J. Dong, L. Peng, S. Yang, J. Li, Construction of nickel and sulfur co-doped carbon nanotubes derived from hydrogen-bonded organic frameworks for

- efficient biomass electrooxidation, *J. Mater. Chem. A*, 2024, **42**, 28853-62.
10. Y. Sun, J. Wang, Y. Qi, W. Li, C. Wang, Efficient Electrooxidation of 5-Hydroxymethylfurfural Using Co-Doped Ni<sub>3</sub>S<sub>2</sub> Catalyst: Promising for H<sub>2</sub> Production under Industrial-Level Current Density, *Adv. Sci.*, 2022, **9**, 2200957.
11. N. Wang, L. Wang, S. Yang, G. He, Y. Liu, H. Jin, Interface engineering of Co<sub>9</sub>S<sub>8</sub>-Ni<sub>3</sub>S<sub>2</sub>/Cu heterogeneous electrocatalyst for enhanced HMF oxidation, *Appl. Surf. Sci.*, 2025, **689**, 162401.
